# Supplementary material for: Pairwise and higher-order correlations among drug-resistance mutations in HIV-1 subtype B protease
Source: PubMed Central journal article supplement (PMC2745583; doi:10.1186/1471-2105-10-s8-s10), 2009-08-27
Supplement: 1471-2105-10-S8-S10-S3.pdf [file 1471-2105-10-S8-S10-S3.pdf]

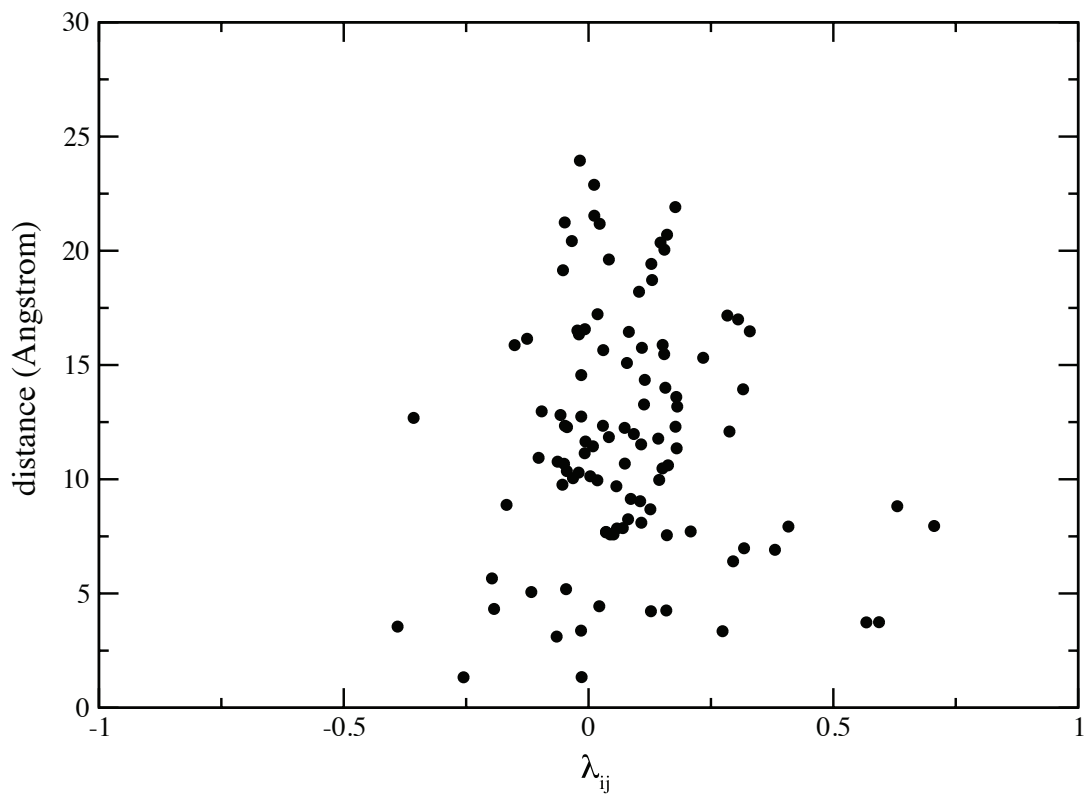

Additional File 3: Scatterplot of distance vs  $\lambda_{ij}$  parameters estimated using  $I$  and  $J$  values of  $\pm 1$  as described in the Methods for the 15-residue group 10–20–33–36–46–54–55–63–71–73–74–82–84–90–93 in the PI2+ cohort. The value along the  $y$ -axis is the closest distance between any two heavy atoms of the two residues based on the crystal structure of wild type protease (PDB ID 1PRO).
